# Supplementary material for: Fabrication of low-fouling, high-loading polymeric surfaces through pH-controlled RAFT
Source: Royal Society of Chemistry journal article supplement (doi:10.1039/d0ra02693j), 2020-01-01
Supplement: d0ra02693j1.pdf [file d0ra02693j1.pdf]

## SUPPORTING INFORMATION

### **Fabrication of low-fouling, high-loading polymeric surfaces through pH-controlled RAFT**

*<sup>1</sup>Department of Chemistry and Chemical Biology, <sup>2</sup>School of Biomedical Engineering,*

*McMaster University, Hamilton, Ontario, L8S 4M1, Canada*

\*Corresponding Author: [wylie@mcmaster.ca](mailto:wylie@mcmaster.ca)

### **Table of Contents**

#### **A. Supplementary table and figures**

- p. S1 – Scheme S1: Mechanism of thiocarbonylthio aminolysis
- p. S2 – Figure S1: <sup>1</sup>H NMR of pCB and pDMAPMA
- p. S3 – Figure S2: Degradation of CTA at pH 4.5 by DMAPMA and pDMAPMA
- p. S4 – Figure S3: GPC chromatograms of pCB distributions as a function of polymerization time at pH 11 without butylamine
- p. S5 – Figure S4: Static water contact angle on thick 1 layer pCB

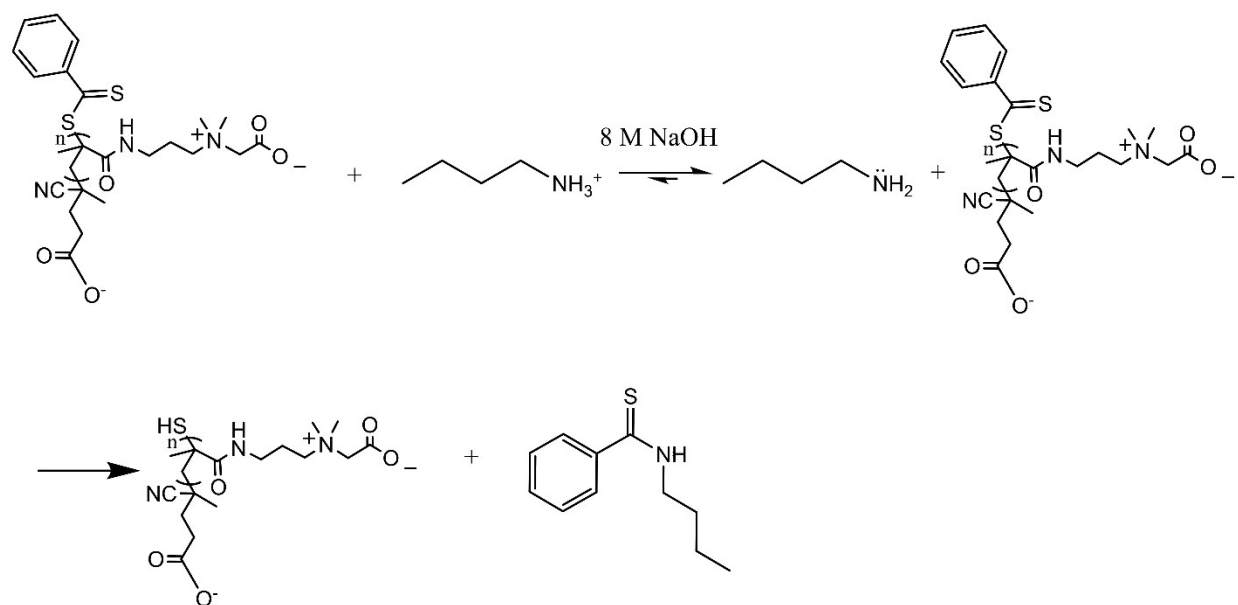

**Scheme S1:** Mechanism of thiocarbonylthio aminolysis: RAFT chain end modification via pH dependent aminolysis

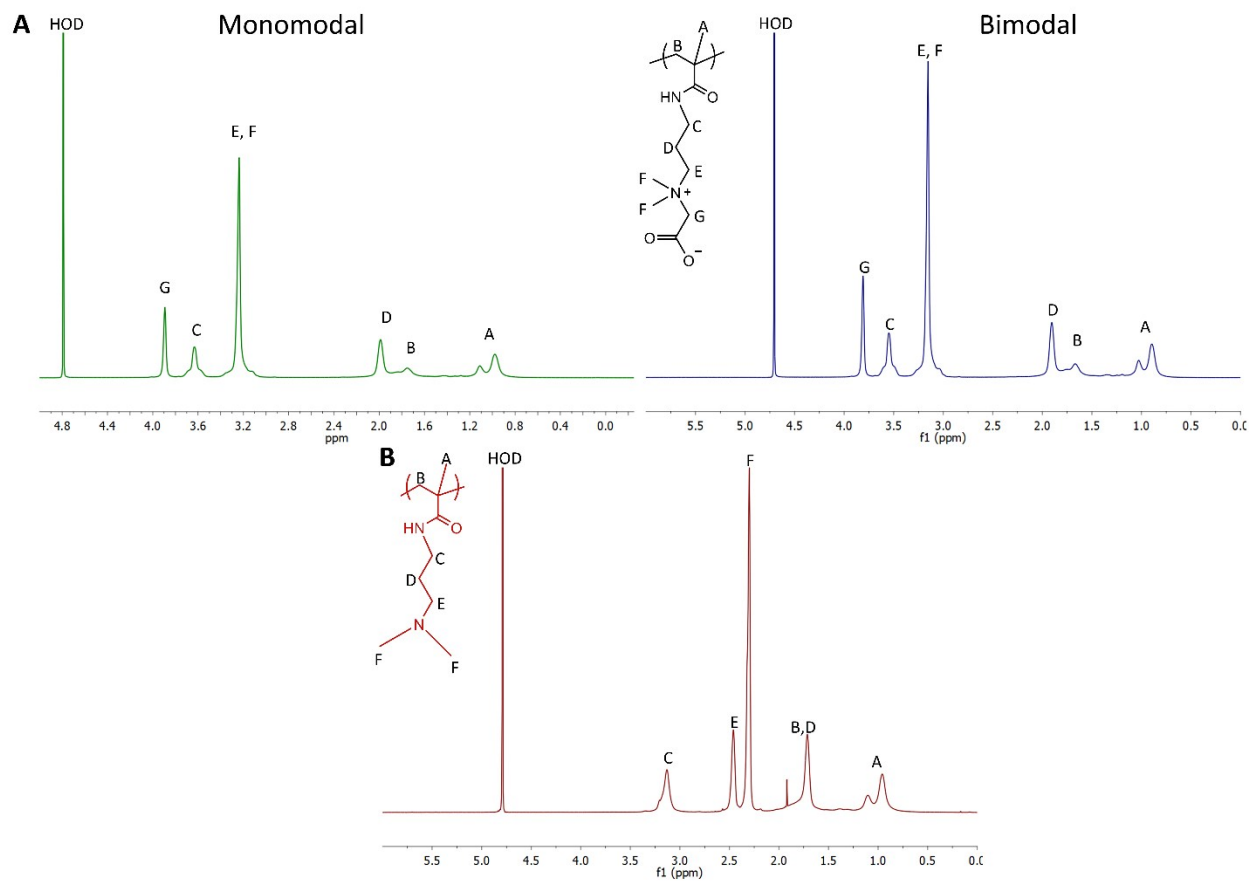

**Figure S1:**  $^1\text{H}$  NMR (600 MHz) spectra of (A) monomodal and bimodal pCB and (B) pDMAPMA in  $\text{D}_2\text{O}$ .

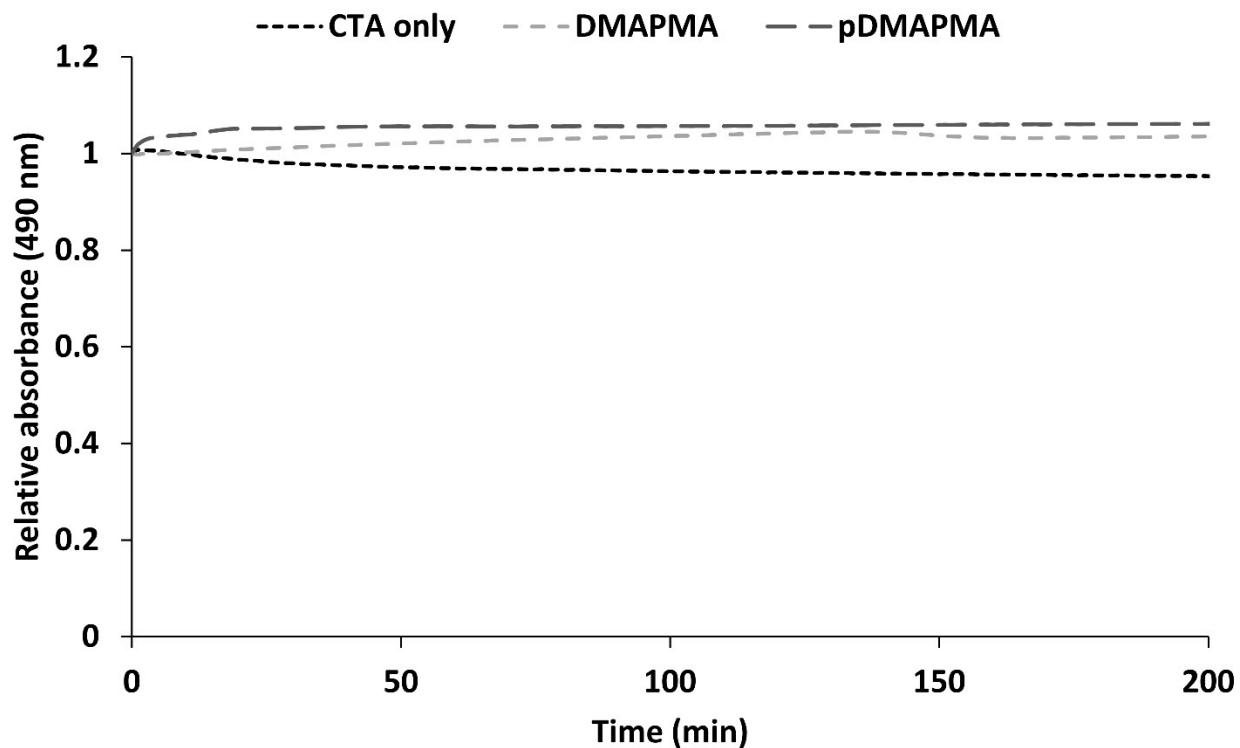

**Figure S2: Degradation of CTA solutions at pH 4.5.** Three solutions of of CTA only, CTA + DMAPMA and CTA + pDMAPMA in 2:1 acetate buffer (0.1 M, pH 4.5) and 1,4-dioxane were prepared. The absorbance at 490 nm will decrease upon aminolysis. No decrease in absorbance was observed when CTA was exposed to DMPAMA or pDMAPMA, indicating the tertiary amine of DMPAMA or pDMAPMA does not result in significant CTA aminolysis at pH 4.5.

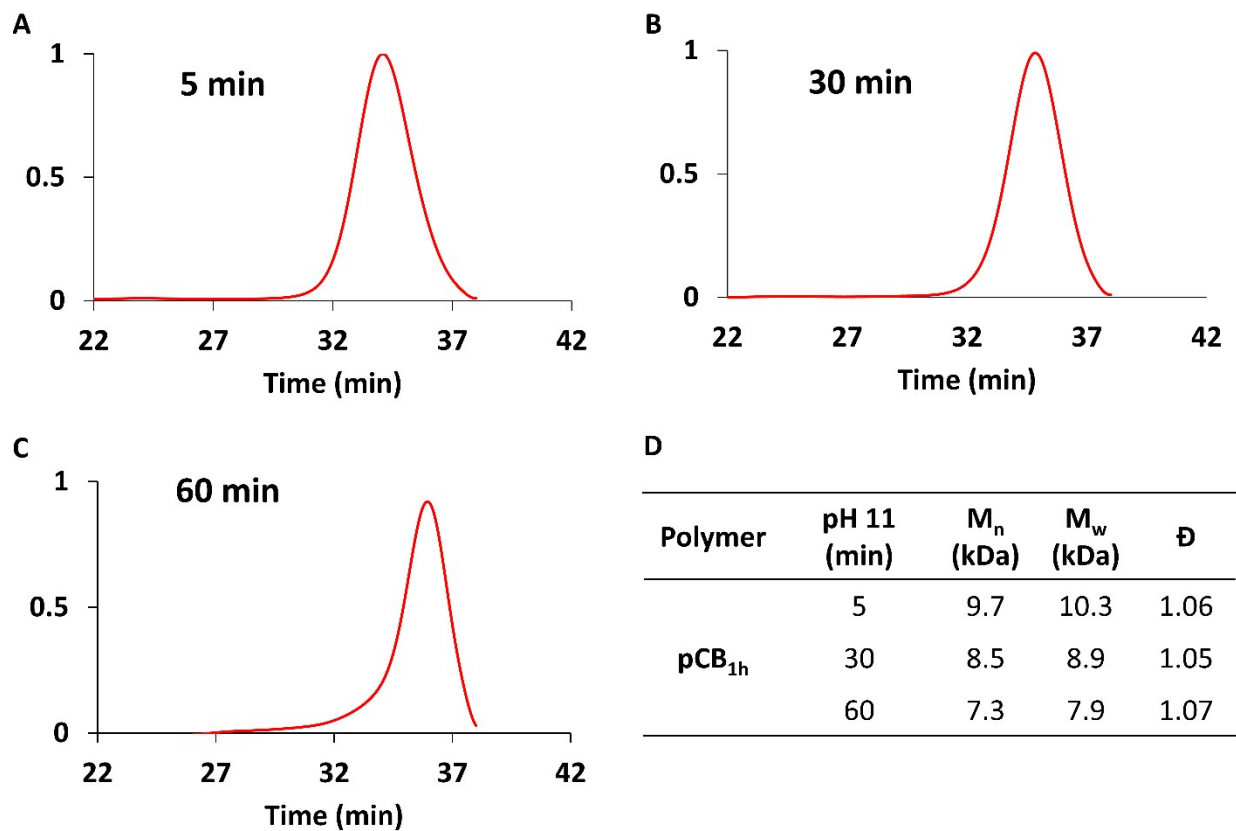

**Figure S3: GPC chromatograms of pCB distributions as a function of polymerization time at pH 11 without butylamine.** pCB synthesized without butylamine where the pH was raised to 11 at 1 h for A) 5, B) 30 and C) 60 min, respectively, with a total polymerization time of 24 h. D) Summary of calculated GPC data for traces A-C. No bimodal distribution was observed in the absence of butylamine.

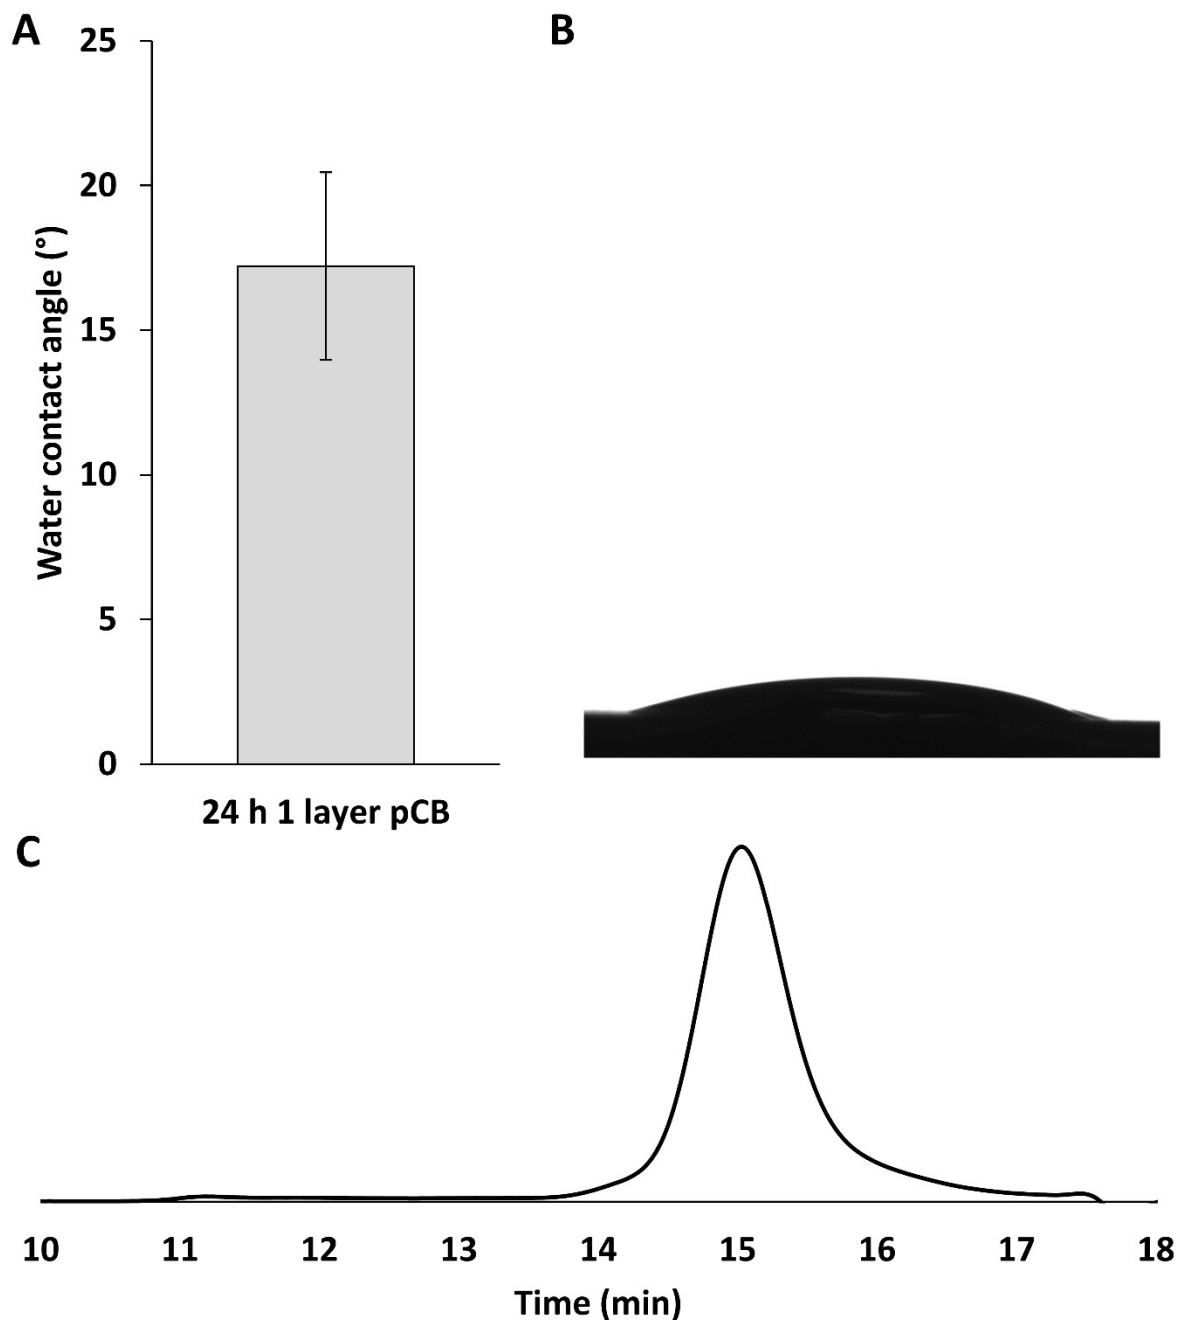

**Figure S4: Thick 1 layer monomodal pCB surface.** A) Static contact angle of 3  $\mu$ L water droplets on wafers functionalized with 1 layer pCB with a total polymerization time of 24 h. The WCA of the thick layer presented here (17) was much lower than thin 1 layer pCB surfaces presented in Figure 4A, demonstrating the thickness dependence of WCA measurements. B) Representative photograph of water droplets on pCB functionalized wafer. C) GPC chromatogram of solution monomodal pCB produced during the synthesis of thick 1 layer pCB surfaces ( $M_w = 29$  kDa,  $\bar{D} = 1.1$ , analyzed on PL aquagel-OH 30 and PL aquagel-OH 40).
